# Supplementary material for: Transport Properties of Thermoplastic R-BAPB Polyimide: Molecular Dynamics Simulations and Experiment
Source: PubMed Central journal article supplement (PMC6918166; doi:10.3390/polym11111775), 2019-10-29
Supplement: polymers-11-01775-s001.pdf [file polymers-11-01775-s001.pdf]

## Electronic Supplementary Information

to

### Transport properties of thermoplastic R-BAPB polyimide: molecular-dynamics simulations and experiment

**I.V. Volgin<sup>1</sup>, M.V. Andreeva<sup>1</sup>, S.V. Larin<sup>1</sup>, A.L. Didenko<sup>1</sup>, G.V. Vaganov<sup>1</sup>, I.L. Borisov<sup>2</sup>,  
A.V. Volkov<sup>2</sup>, L.I. Klushin<sup>1,3</sup>, S.V. Lyulin<sup>1,\*</sup>**

<sup>1</sup> *Institute of Macromolecular Compounds, Russian Academy of Sciences, Russian Federation, St. Petersburg, 199004, Bolshoy pr. V.O., 31.*

<sup>2</sup> *A.V. Topchiev Institute of Petrochemical Synthesis, Russian Academy of Sciences, Russian Federation, Moscow, 119991, Leninsky pr., 29.*

<sup>3</sup> *American University of Beirut, Department of Physics, Lebanon, Beirut 1107 2020, P.O. Box 11-0236.*

**\*Corresponding author, e-mail: Sergey V. Lyulin, [s.v.lyulin@gmail.com](mailto:s.v.lyulin@gmail.com)**

**Table S1.** Properties of R-BAPB thin film membrane considered in the work.

| $T_g$ , K                                                                                                                                                                                    | $T_m$ , K | $\tau_5$ , K | $\sigma$ , MPa | $E$ , MPa | $\epsilon$ , % |
|----------------------------------------------------------------------------------------------------------------------------------------------------------------------------------------------|-----------|--------------|----------------|-----------|----------------|
| 485                                                                                                                                                                                          | 599       | 805          | 108.4±13.5     | 2514±104  | 95.2±33.2      |
| $T_g$ – glass transition temperature, $T_m$ – melting temperature, $\tau_5$ – decomposition temperature, $\sigma$ – tensile strength, $E$ – elasticity modulus, $\epsilon$ – tensile strain. |           |              |                |           |                |

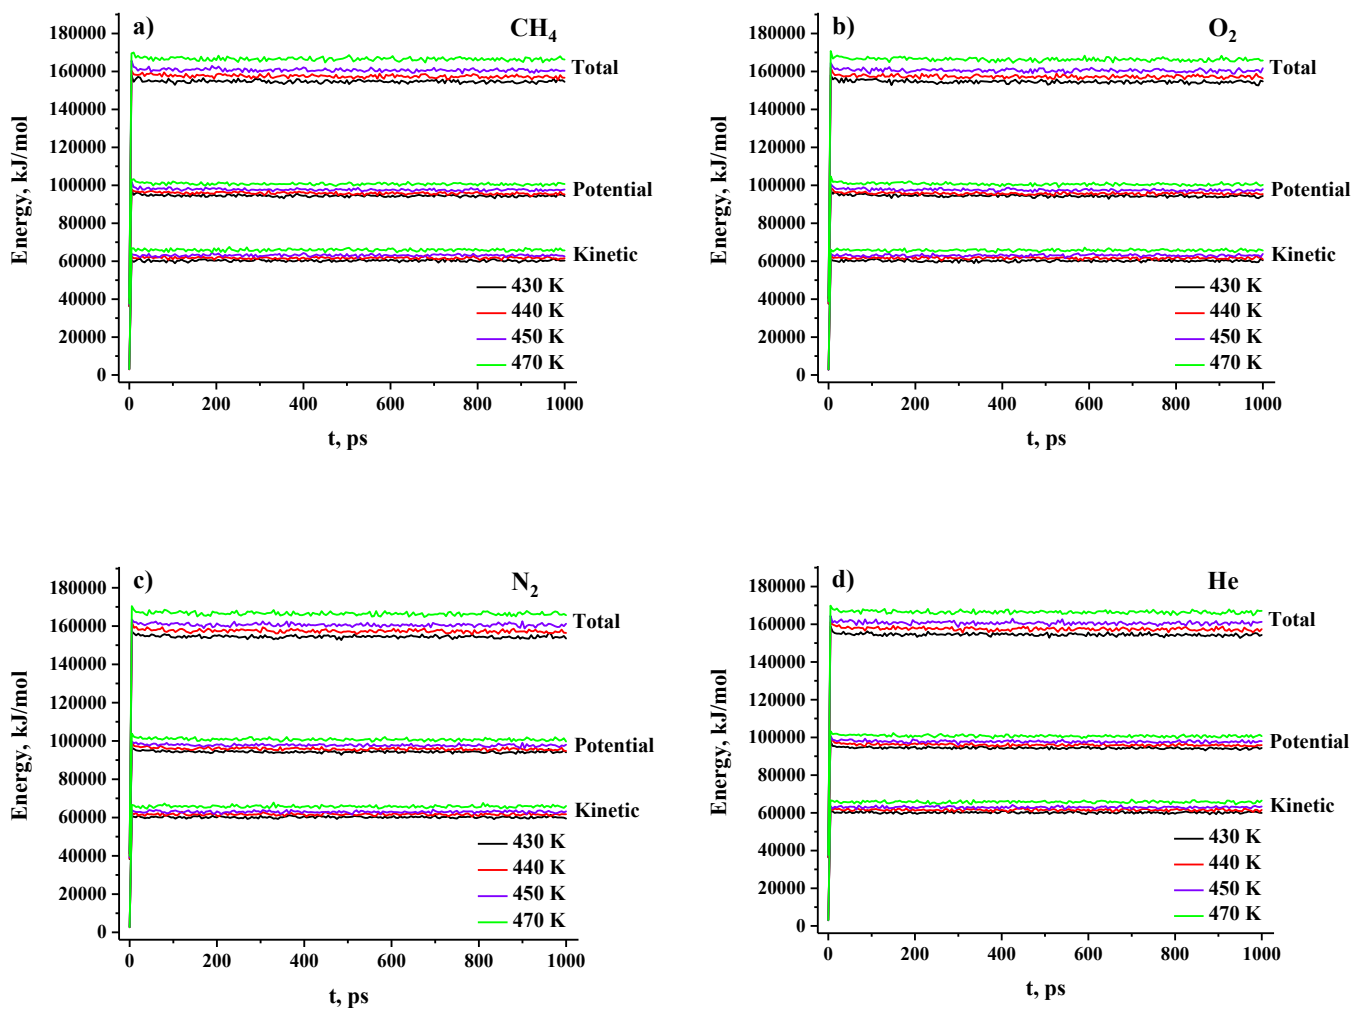

**Figure S1.** Time dependence of the potential, kinetic and total energies of R-BAPB sample containing a) CH<sub>4</sub>, b) O<sub>2</sub>, c) N<sub>2</sub>, or d) He at different temperatures after energy minimization.

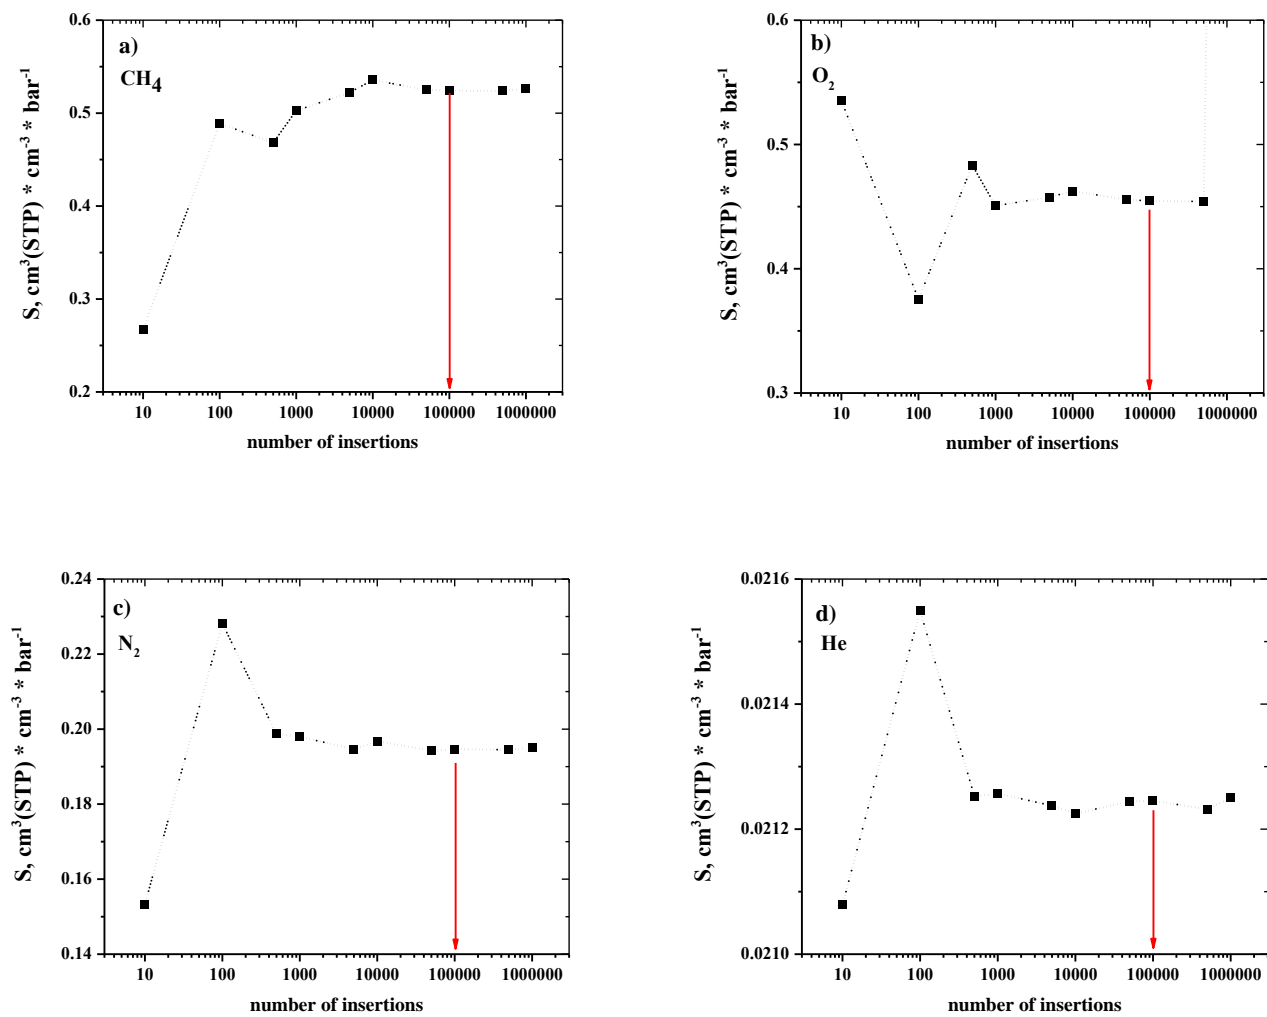

**Figure S2.** Dependence of the solubility coefficient of a) CH<sub>4</sub>, b) O<sub>2</sub>, c) N<sub>2</sub>, or d) He at STP conditions calculated from a single trajectory obtained at  $T = 300$  K on the number of the test particle insertions. The arrow denotes an optimal number of insertions ( $n = 100,000$ ).

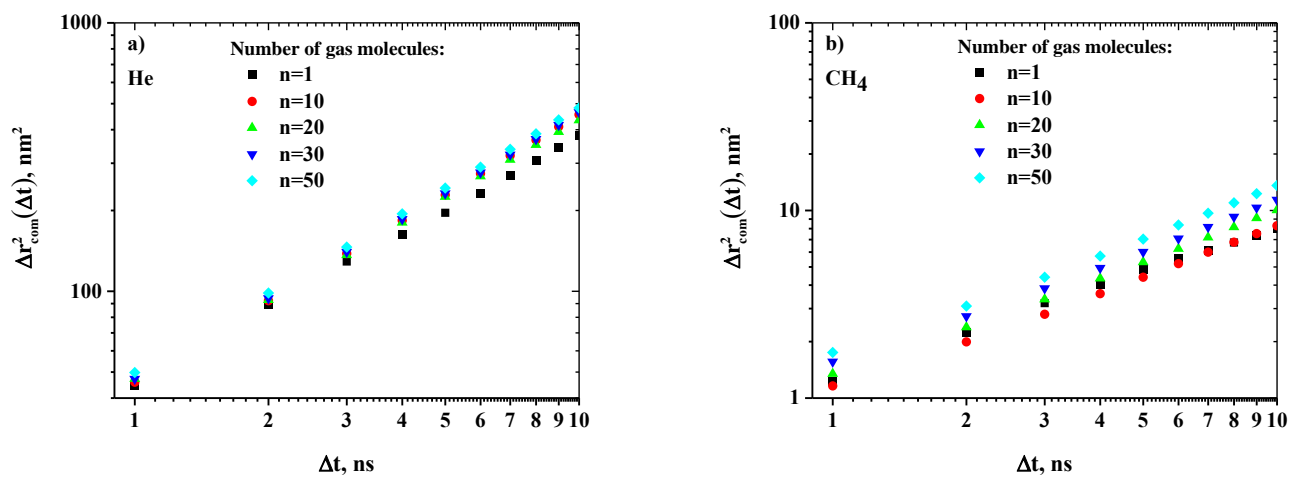

**Figure S3.** Time-dependence of mean squared displacement of a) He or b)  $\text{CH}_4$  gas molecules in R-BAPB at different concentrations (number of gas molecules in the system) at  $T = 470$  K calculated over 100 ns.

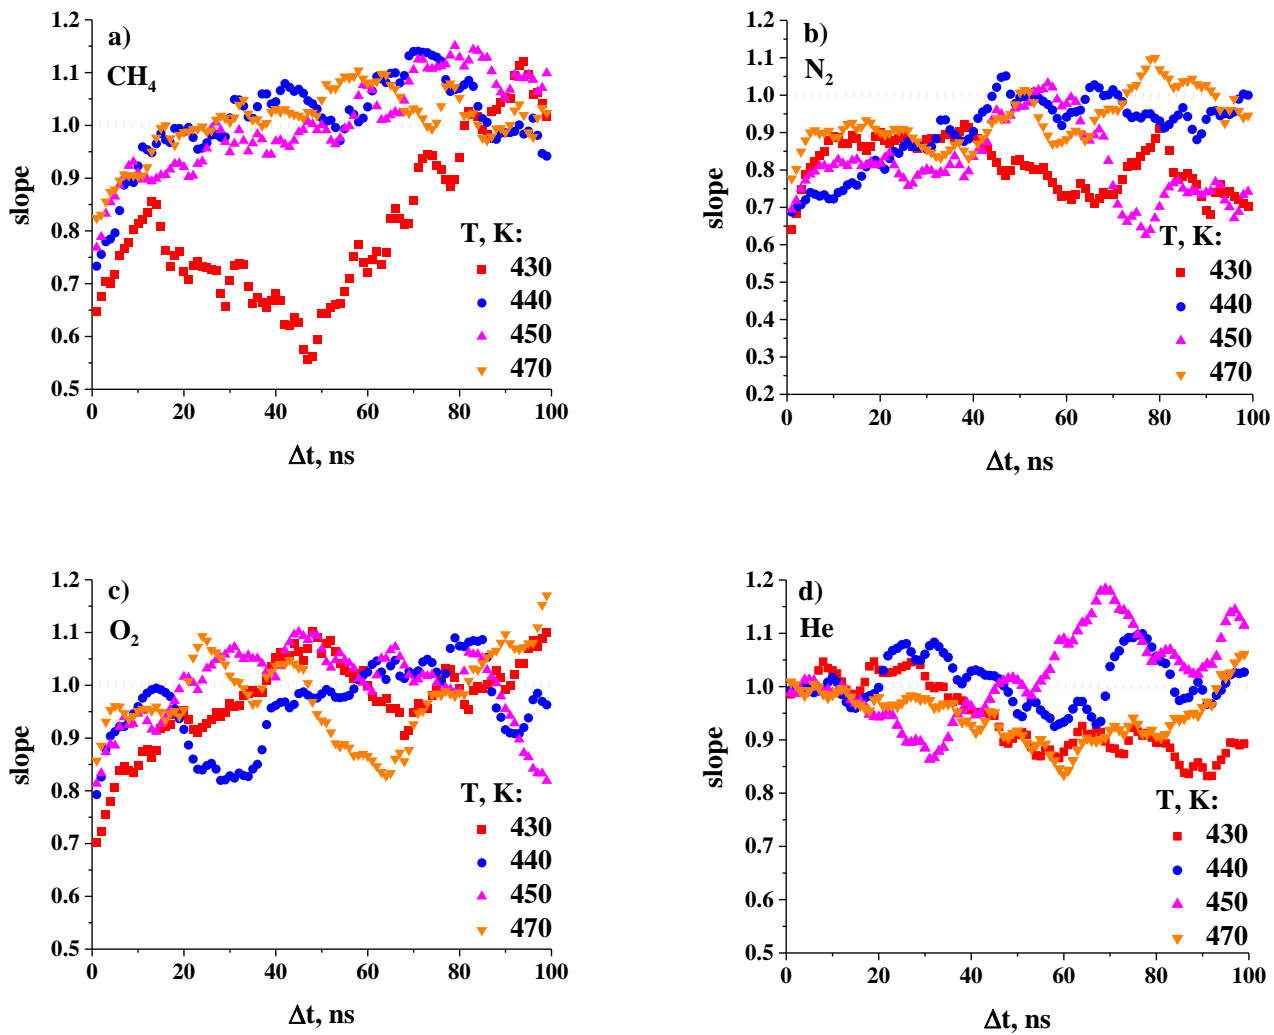

**Figure S4.** Time-dependence of the slope of the mean squared displacement of a) CH<sub>4</sub>, b) O<sub>2</sub>, c) N<sub>2</sub>, or d) He gas molecules in R-BAPB at different temperatures (the number of gas molecules in the system is equal 10).
